# Supplementary material for: Catalytic and Medical Potential of a Phyto-Functionalized Reduced Graphene Oxide–Gold Nanocomposite Using Willow-Leaved Knotgrass
Source: PubMed Central journal article supplement — ACS Omega. 2021 Dec 8;6(50):34954–66. doi: 10.1021/acsomega.1c05596 (PMC8697594; doi:10.1021/acsomega.1c05596), 2021-12-08
Supplement: ao1c05596_si_001.pdf [file ao1c05596_si_001.pdf]

# Catalytic and Medical Potentials of Phyto-Functionalized Reduced Graphene Oxide-Gold Nanocomposite Using Willow-Leaved Knotgrass

Nourhan El-Maghrabi<sup>1</sup>, Ola M. El-Borady<sup>2</sup>, Mohamed Hosny<sup>1\*</sup>, and Manal Fawzy<sup>1,3</sup>

<sup>1</sup> Green Technology Group, Environmental Sciences Department, Faculty of Science, Alexandria University, 21511, Alexandria, Egypt.

<sup>2</sup> Institute of Nanoscience and Nanotechnology, Kafrelsheikh University, Kafrelsheikh, Egypt.

<sup>3</sup> National Egyptian Biotechnology Experts Network, National Egyptian Academy for Scientific Research and Technology.

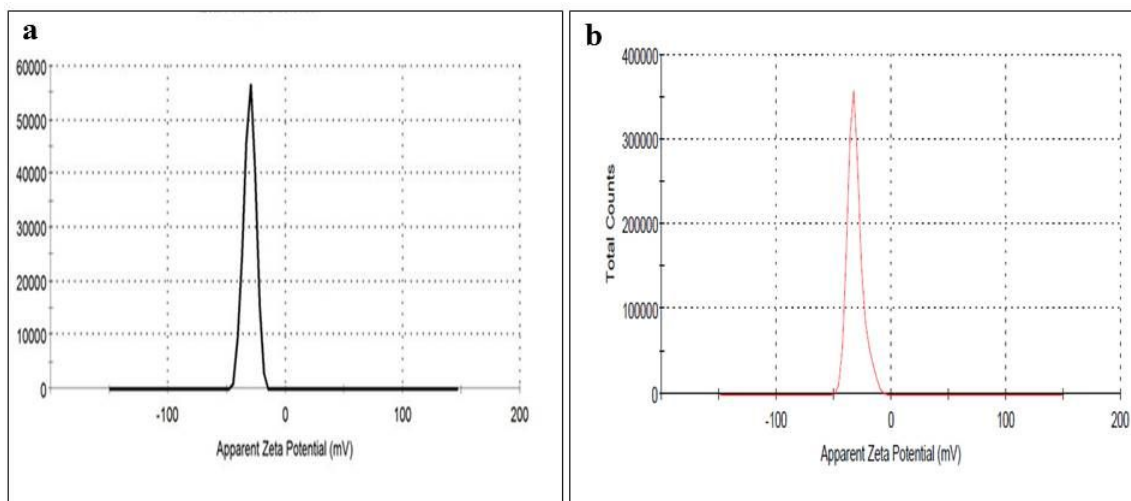

**Figure. S1.** Zeta potential of GO (a) and rGO-AuNPs (b).

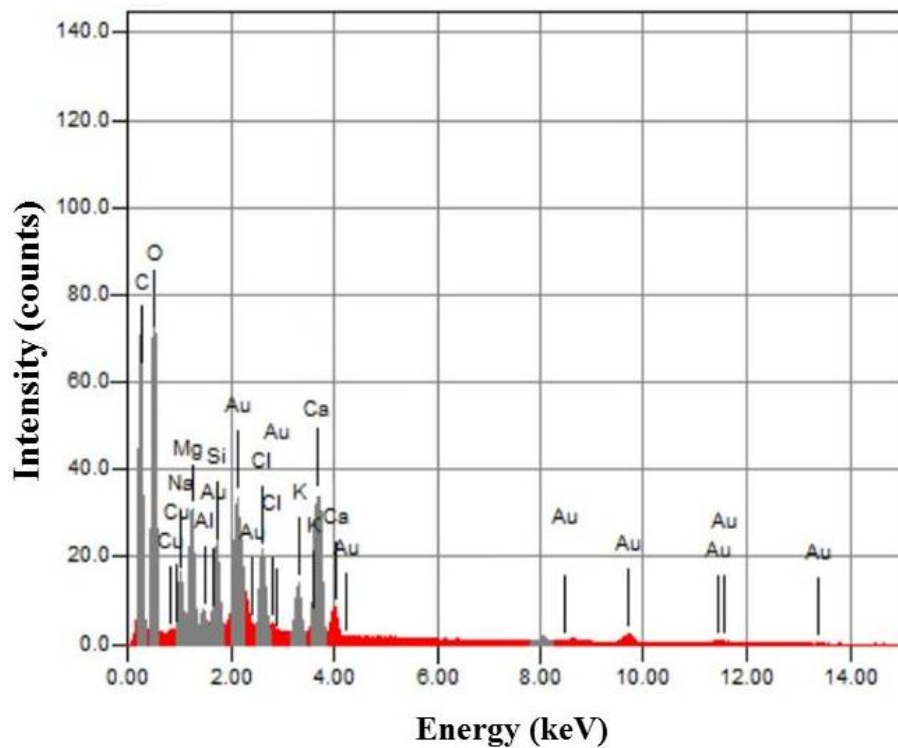

Figure. S2. EDX spectrum of rGO-AuNPs.

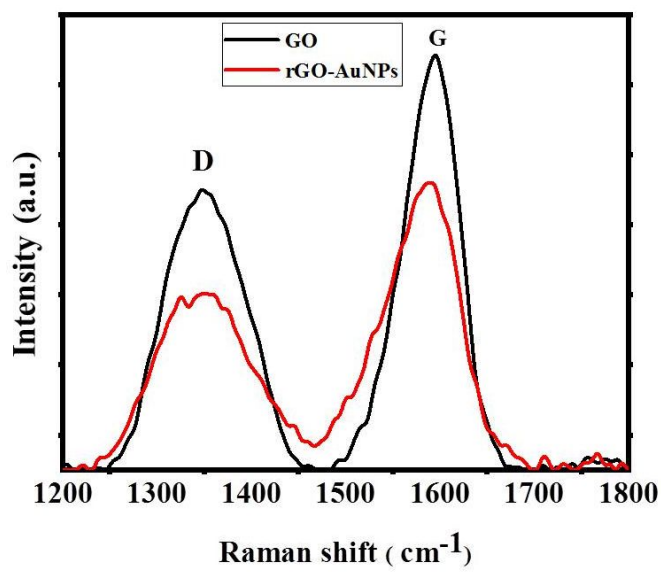

Figure. S3. Raman spectra of GO and rGO-AuNPs.

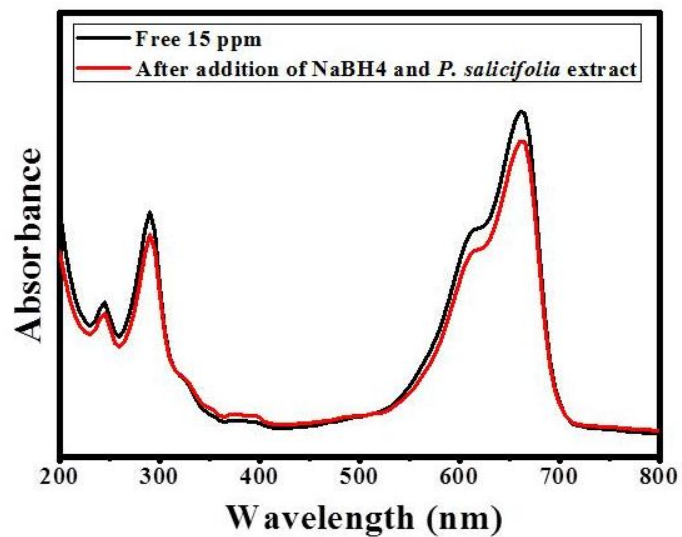

**Figure. S4.** Efficiency of *P. salicifolia* extract in MB (15 ppm) catalytic degradation.

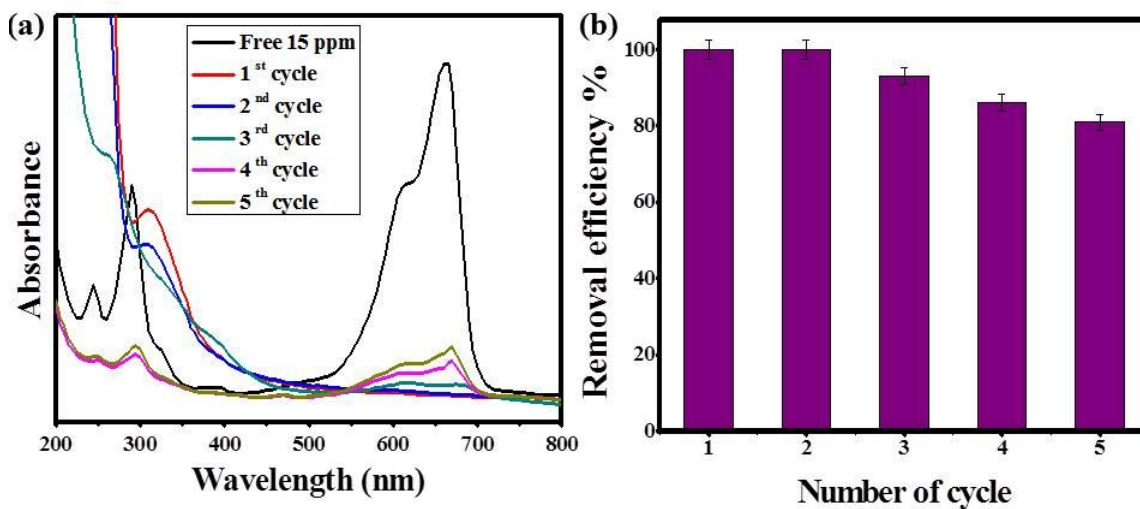

**Figure S5. (a)** Reusability of rGO-AuNPs in MB catalytic degradation **(b)** Removal percentage with number of cycles.
